# Supplementary material for: An anticorrosive zinc metal anode with ultra-long cycle life over one year
Source: Royal Society of Chemistry journal article supplement (doi:10.1039/d1ee03882f), 2022-01-01
Supplement: d1ee03882f1.pdf [file d1ee03882f1.pdf]

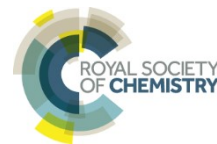

**Journal Name**

ARTICLE

## Supporting Information

### **An Anticorrosive Zinc Metal Anode with Ultra-long Cycle Life over One Year**

*Ping Xiao,<sup>a</sup> Haobo Li,<sup>a</sup> Jinzhou Fu,<sup>a</sup> Cheng Zeng,<sup>a</sup> Yinghe Zhao,<sup>a</sup> Tianyou Zhai,<sup>a</sup> and Huiqiao Li<sup>\*a</sup>*

P. Xiao, H.B. Li, J.Z. Fu, C. Zeng, Prof Y.H. Zhao, Prof T.Y. Zhai, Prof H.Q. Li

*<sup>a</sup>State Key Laboratory of Material Processing and Die & Mould Technology, School of Materials Science and Engineering, Huazhong University of Science and Technology (HUST), Wuhan 430074, P. R. China.*

\* Corresponding author: Prof. H. Q. Li, E-mail: [hqli@hust.edu.cn](mailto:hqli@hust.edu.cn)

## 1. Experimental Section

**Material Synthesis:** The Zn@In anode was prepared by the chemical substitution method, and the procedure was as follows:  $\text{InCl}_3 \cdot 4\text{H}_2\text{O}$  (0.59 g) was dispersed in ultra-pure water (100 mL) at room temperature. Then, the Zn plate (100  $\mu\text{m}$ , 10 cm x 10 cm) polished was immersed in the obtained solution for 5 minutes to obtain the Zn@In plate. After that, the obtained Zn@In plate was washed with ultra-pure water and ethanol, respectively. Finally, the Zn@In plate was cut into the suitable size discs ( $\Phi 10$  mm and  $\Phi 14$  mm) or strips (1 cm x 2 cm) as electrodes.

**Materials Characterization:** X-ray diffraction (XRD) patterns of different electrodes were collected by a Bruker D2 PHASER diffractometer using  $\text{Cu K}\alpha$  ( $\lambda = 1.541 \text{ \AA}$ ) from  $10^\circ$  to  $80^\circ$ . Scanning electron microscopy (SEM) and corresponding EDS elemental mapping images were obtained from a scanning electron microscope (FEI Quanta650 FEG). The confocal laser scanning microscope (CLSM) images were collected by the Keyence VK-X200K microscope. The contact angle was measured by Kruss DSA 100. The in-situ optical images were obtained on the optical microscope (OLYMPUS BX51) by using a homemade optical cell.

**Cell assembling:** The Zn|Zn symmetric cells were assembled using Zn plates with a diameter of 10 mm or 14mm and thickness of 0.1 mm. The glass fiber separators (GF/A,  $\Phi = 16$  mm, Whatman) and 2 M  $\text{ZnSO}_4$  was used as separator and electrolyte respectively. The Zn/ $\text{MnO}_2$  full cells were assembled similarly.  $\text{MnO}_2$  nanofibers were prepared by the way reported.<sup>[1]</sup> Active material ( $\text{MnO}_2$ ), Ketjen black, and binder (PTFE) were mixed at a weight ratio of 7:2:1 and formed slurry using isopropanol. Then the slurry was coated on a Ti plate ( $\Phi 10$  mm) and dried at room temperature for 12 h. After that, the obtained electrodes were the cathode of the Zn/ $\text{MnO}_2$  full cells. Meanwhile, 2 M  $\text{ZnSO}_4 + 0.1$  M  $\text{MnSO}_4$  were used as the electrolyte.

**Electrochemical measurements:** The CV data and linear sweep voltammetry (LSV) measurements were conducted on a CH Instruments electrochemical workstation (CHI 760e). Among them, LSV measurements were carried out in 1 M  $\text{Na}_2\text{SO}_4$  at a sweep rate of  $5 \text{ mV s}^{-1}$  from  $-1.1$  V to  $-2.1$  V, where Zn plates (1 x 2  $\text{cm}^2$ ) were used as the working electrode and the counter electrode at the same time and the saturated calomel electrode (SCE) was used as the reference electrode. Galvanostatic charge-discharge and chronopotentiometry tests were performed on a LAND system. Besides, the chronopotentiometry was achieved with Zn plate as the working electrode, counter electrode, and reference electrode at  $1 \text{ mA cm}^{-2}$  for 1 h in 2 M  $\text{ZnSO}_4$  aqueous electrolyte. The electrochemical impedance spectroscopy (EIS) data was recorded on the Solartron Electrochemical Interface SI 1287 and SI 1260.

**Calculation methods:** HER behavior on Zn (101) and In (101) surfaces were investigated by analyzing the free energy of hydrogen adsorption. The energies of all adsorption models were computed by Vienna Ab-initio Simulation Package (VASP).<sup>[2]</sup> Pseudopotentials and the projector-augmented wave methods were used to simulate the electron-ion interaction.<sup>[3, 4]</sup> All calculations were done with Perdew-Burke-Ernzerhof generalized gradient approximation (PBE-GGA) and the projected augmented wave (PAW) method based on periodically repeated slab models.<sup>[5, 6]</sup> 450eV and 0.02eV/ $\text{\AA}$  were set as the cut-off energies for plane waves and the convergence tolerance of force on each atom during structure relaxation, respectively.

The free energy of hydrogen adsorption at equilibrium is calculated as

$$\Delta G_{H^*} = \Delta E_{\text{H}} + \Delta E_{\text{ZPF}} - T\Delta S_{\text{H}}$$

With

$$\Delta E_H = E_{H+Slab} - E_{Slab} - \frac{1}{2}E_{H_2}$$

Where  $E_{H_2}$  refers to the energy of a free gas-phase  $H_2$  molecule;  $E_{Slab}$  and  $E_{H+Slab}$  are energies of a clean Zn (101) or In (101) slab and an H@Zn (101) or H@In (101) slab, respectively.  $\Delta E_{ZPE}$  represents the gap of the zero point energy for the adsorbed state and the gas phase. Given the vibrational entropy of  $H^*$  in the adsorbed state is small, the adsorption entropy of  $1/2 H_2$  is  $\Delta S_H \approx -1/2 S^0_{H_2}$ , where  $S^0_{H_2}$  is the entropy of  $H_2$  in the gas phase under standard conditions. All the corrections are taken together in

$$\Delta G_{H^*} \approx \Delta E_H + 0.24\text{eV}$$

## 2. Supplementary Figures and Table

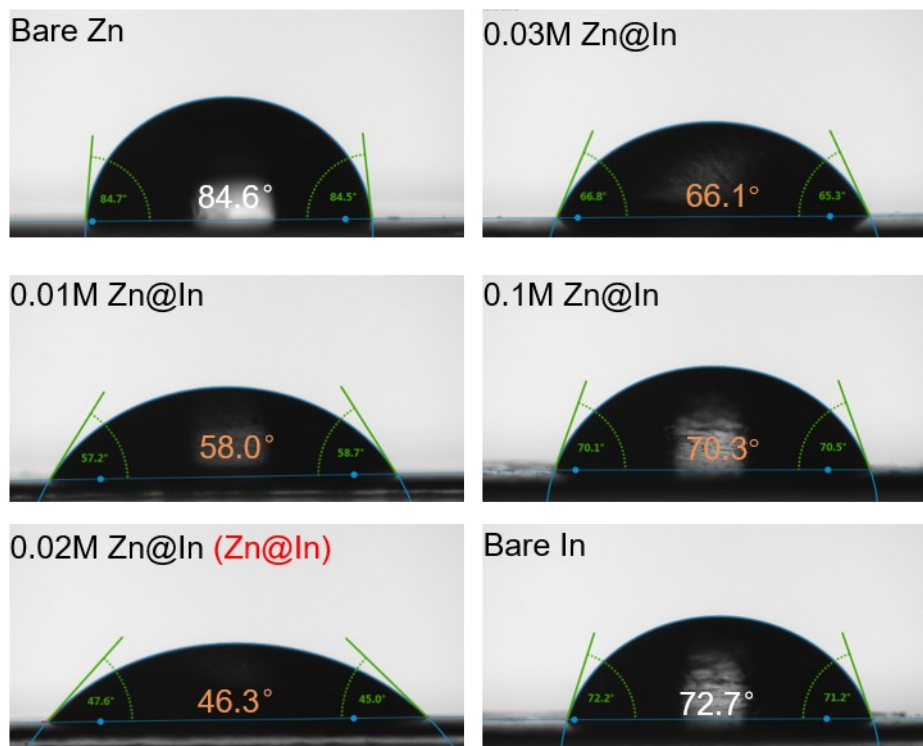

Fig. S1. Images of contact angles on different electrodes.

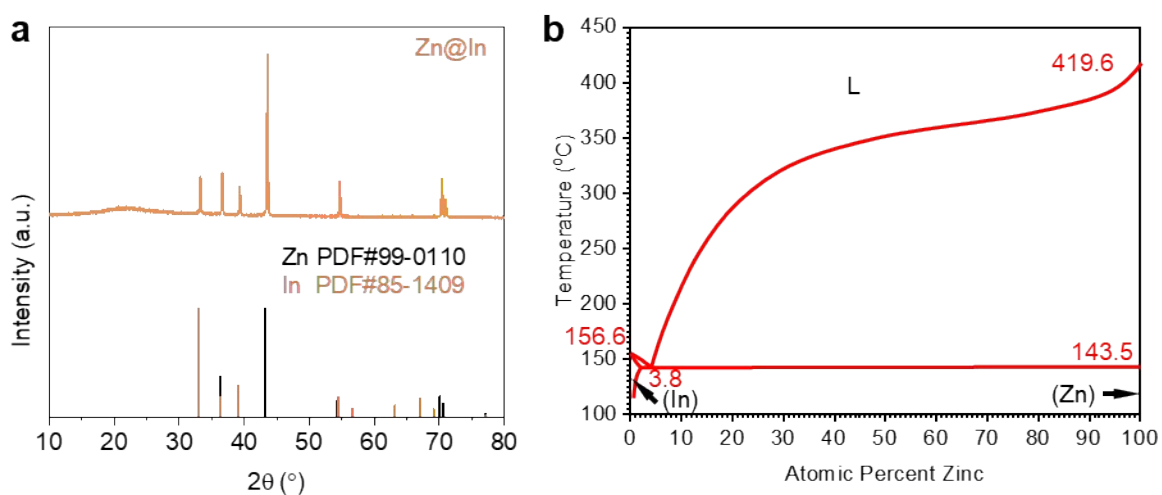

Fig. S2. a) XRD pattern of Zn@In. b) Phase diagrams of Zn with indium. [7]

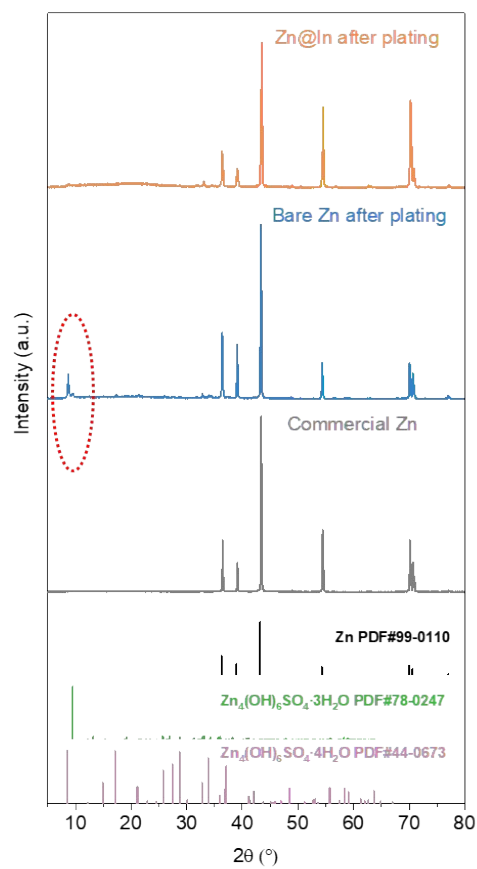

**Fig. S3.** XRD patterns of commercial Zn foil, bare Zn and Zn@In after plating.

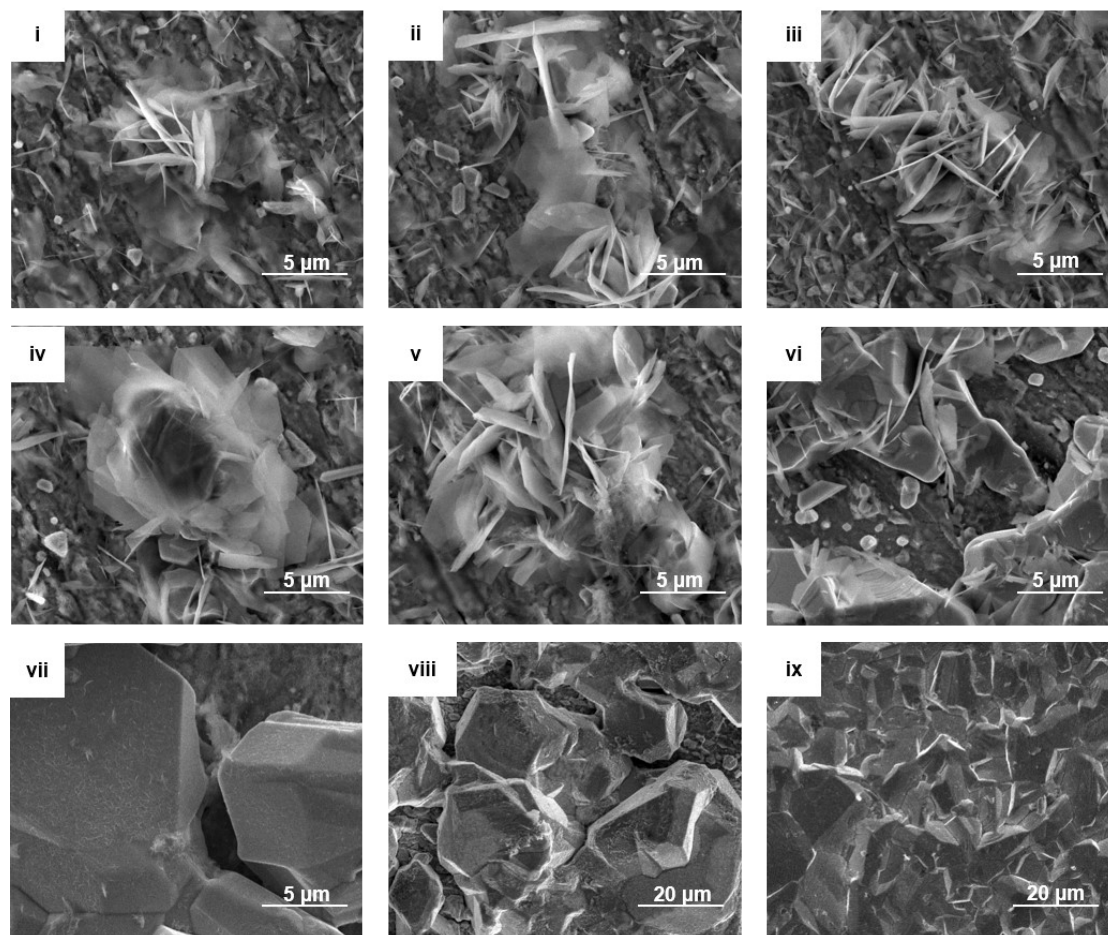

**Fig. S4.** SEM images of Zn deposits evolution at different growth states along with different deposition capacities at a current density of  $2 \text{ mA cm}^{-2}$  on Zn@In anode.

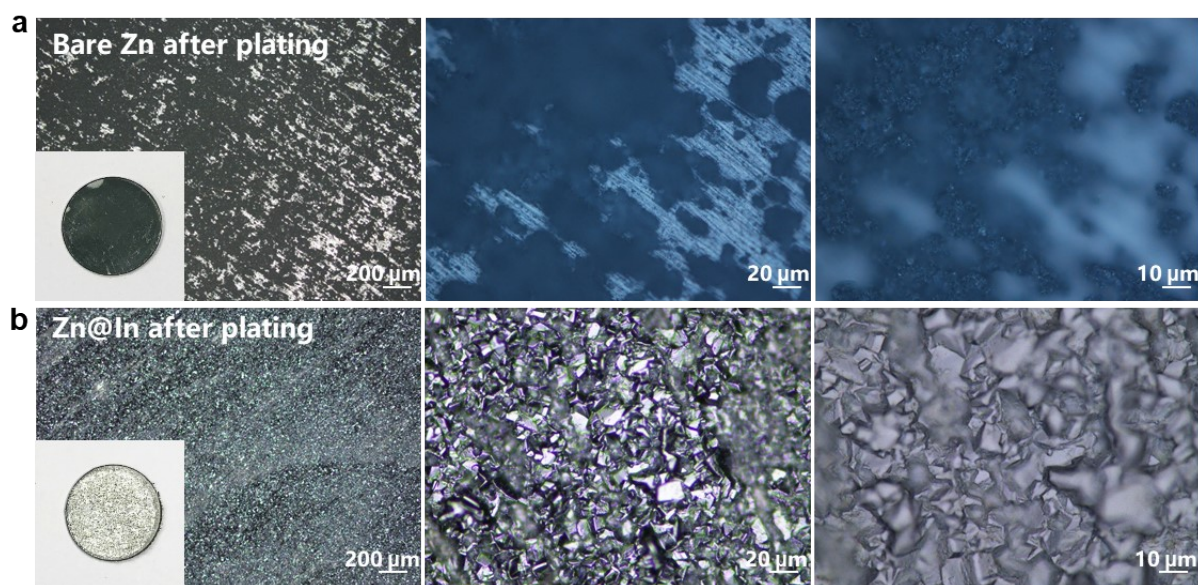

**Fig. S5.** Optical microscope images of the a) bare Zn and b) Zn@In after plating at a current density of  $2 \text{ mA cm}^{-2}$  for 1 h at different magnifications.

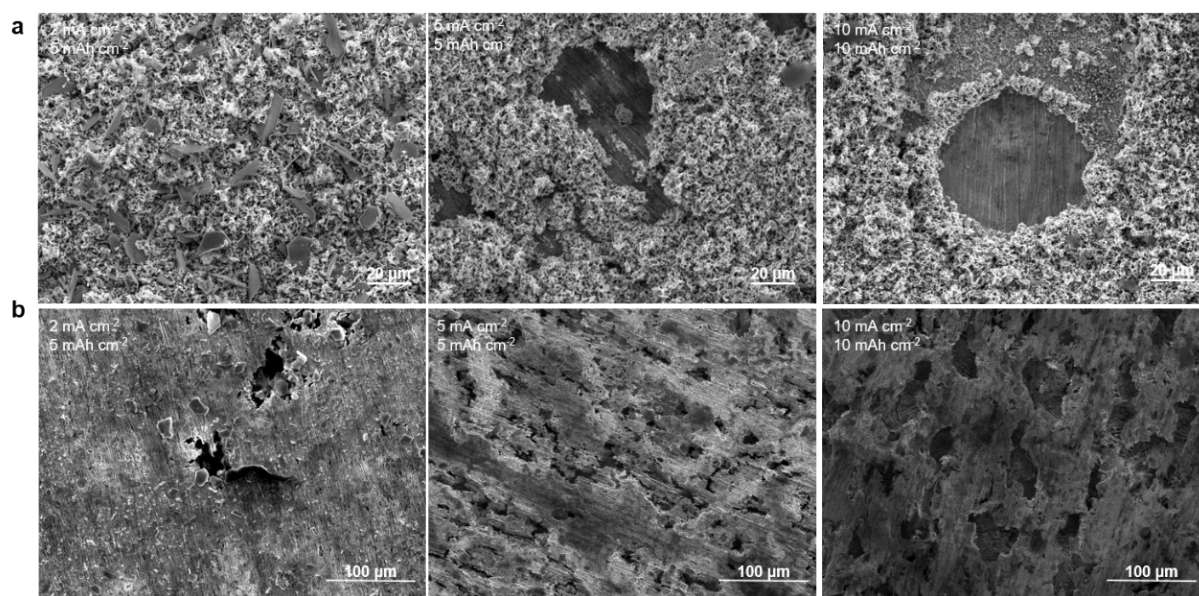

**Fig. S6.** SEM images of bare Zn a) after plating; and b) after stripping at the selected current density.

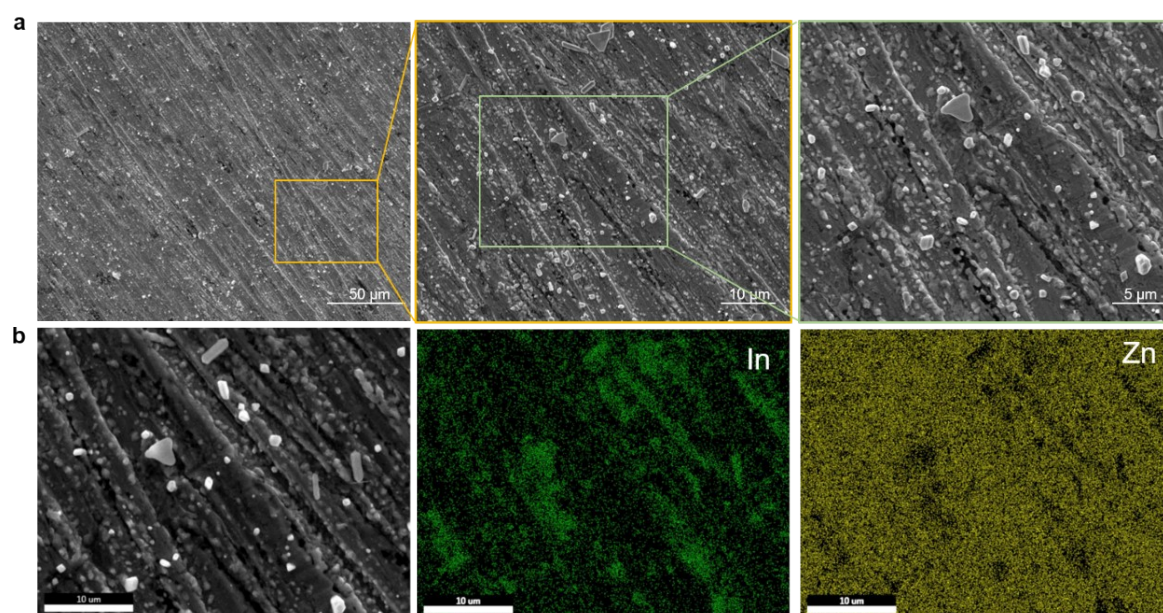

**Fig. S7.** Top-view SEM and corresponding EDS elemental mapping images of Zn@In.

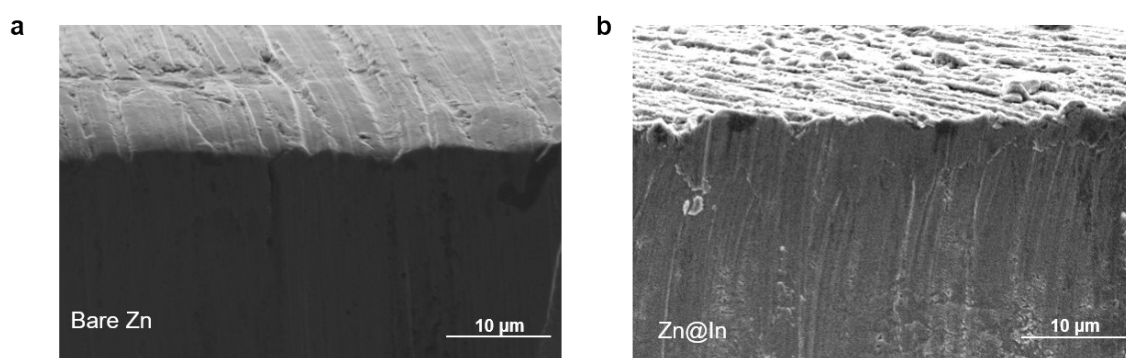

**Fig. S8.** Cross-section SEM images of a) bare Zn and b) Zn@In anode.



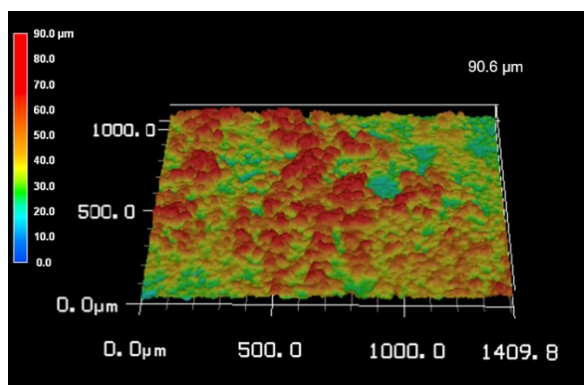

Fig. S9. CLSM optical images for bare Zn after 30 cycles.

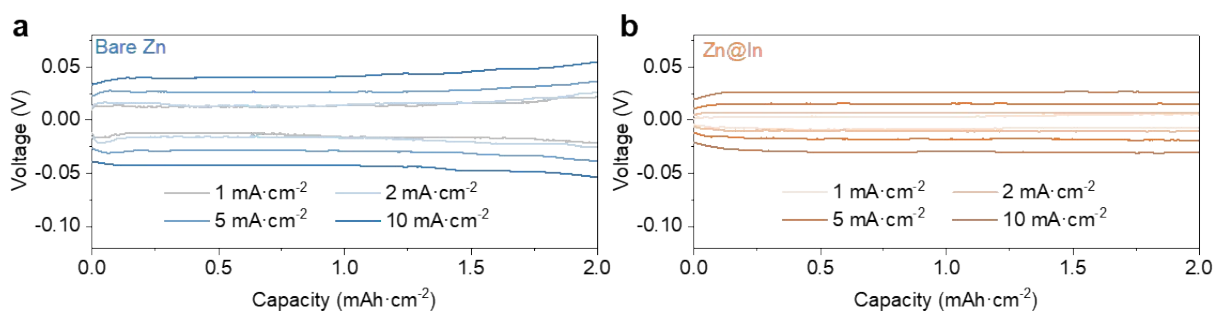

Fig. S10. The voltage hysteresis profiles of a) bare Zn and b) Zn@In at selected current density.

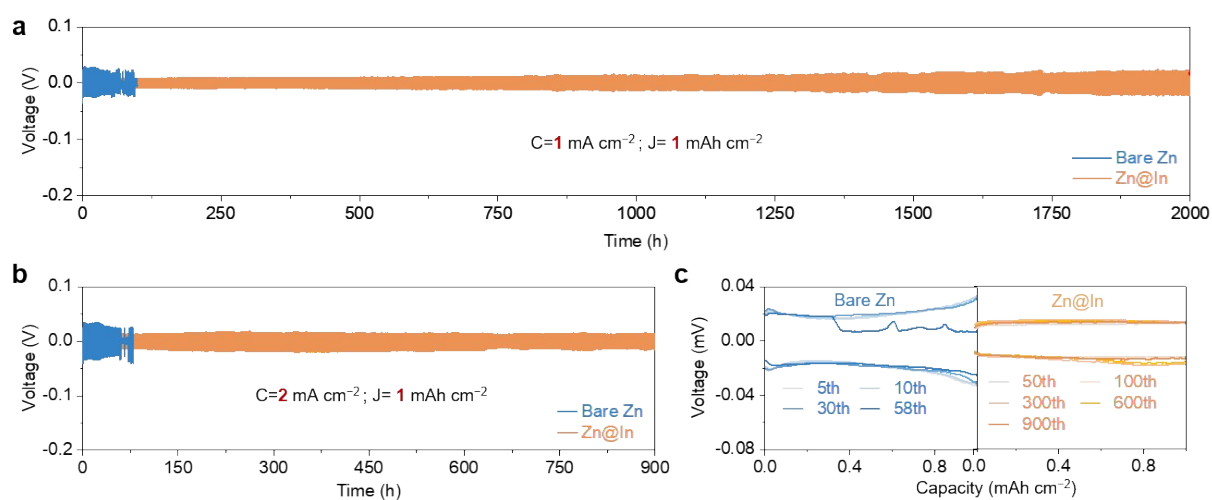

Fig. S11. Long-term galvanostatic cycling performance of Zn||Zn symmetric cells at a)  $1 \text{ mA cm}^{-2}$  for  $1 \text{ mAh cm}^{-2}$ ; and b)  $2 \text{ mA cm}^{-2}$  for  $1 \text{ mAh cm}^{-2}$ ; c) the corresponding voltage hysteresis profiles of bare Zn and Zn@In at the current density of  $2 \text{ mA cm}^{-2}$ .

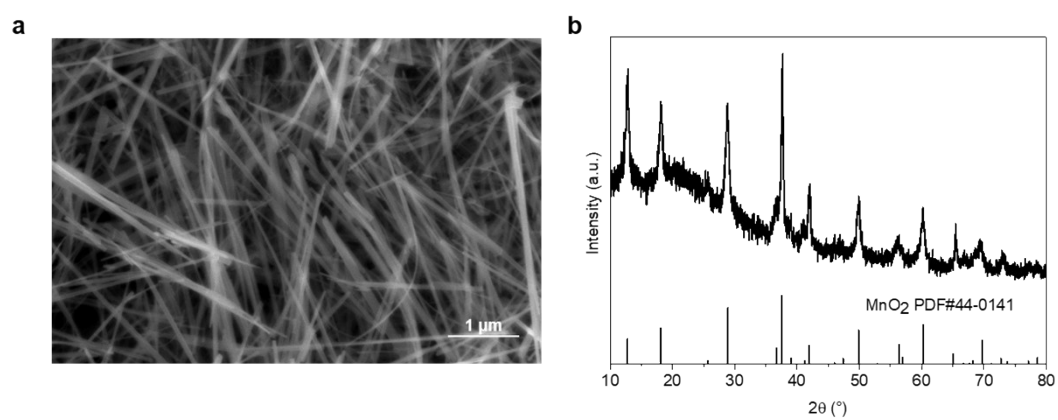

**Fig. S12.** a) SEM images and b) XRD patterns of the prepared MnO<sub>2</sub>.

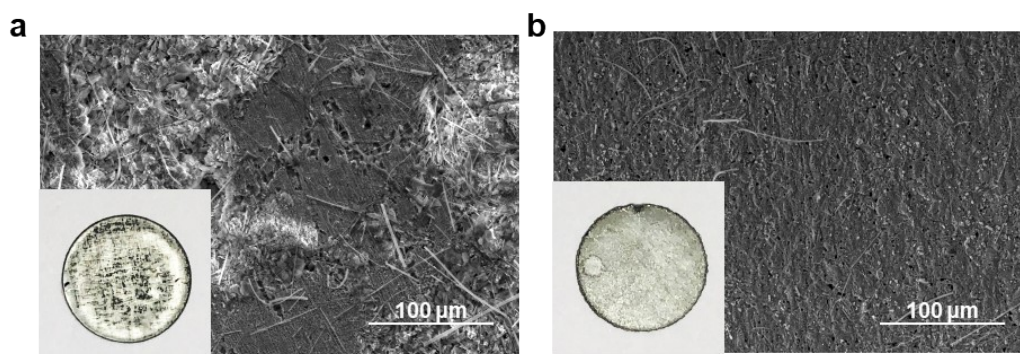

**Fig. S13.** Optical images and corresponding SEM images of a) bare Zn and b) Zn@In after 300 cycles.

**Table S1** Comparison in voltage hysteresis and cycling life between our Zn@In electrode and previously reported Zn metal electrodes on Zn symmetric cells.

| Sample                                                       | Electrolytes                                       | Current density<br>areal capacity                                                                          | Voltage<br>hysteresis at 1st<br>cycle | Cycling<br>life           | Reference                              |
|--------------------------------------------------------------|----------------------------------------------------|------------------------------------------------------------------------------------------------------------|---------------------------------------|---------------------------|----------------------------------------|
| <b>Zn@In</b>                                                 | <b>2 M ZnSO<sub>4</sub></b>                        | <b>1 mA cm<sup>-2</sup><br/>0.5 mAh cm<sup>-2</sup>;<br/>1 mA cm<sup>-2</sup><br/>1mAh cm<sup>-2</sup></b> | <b>18 mV</b>                          | <b>9400 h;<br/>2000 h</b> | <b>This work</b>                       |
| Nano-CaCO <sub>3</sub> -coated Zn                            | 3 M ZnSO <sub>4</sub><br>+ 0.1 M MnSO <sub>4</sub> | 1 mA cm <sup>-2</sup><br>0.1 mAh cm <sup>-2</sup>                                                          | 70 mV                                 | 80 h                      | Adv. Energy Mater. 2018, 8, 1801090.   |
| MXene-coated Zn                                              | 2 M ZnSO <sub>4</sub>                              | 1 mA cm <sup>-2</sup><br>1 mAh cm <sup>-2</sup>                                                            | 100 mV                                | 150 h                     | Angew. Chem. Int. Ed. 2020, 60, 2861.  |
| 502-coated Zn                                                | 2 M ZnSO <sub>4</sub>                              | 0.5 mA cm <sup>-2</sup><br>0.25 mAh cm <sup>-2</sup>                                                       | 50 mV                                 | 800 h                     | Energy Storage Mater. 2021, 36, 132.   |
| Indium hydroxide sulfate-coated Zn                           | 3 M ZnSO <sub>4</sub>                              | 1 mA cm <sup>-2</sup><br>0.5 mAh cm <sup>-2</sup>                                                          | 40 mV                                 | 700 h                     | J. Am. Chem. Soc. 2021, 143, 3143.     |
| Montmorillonite-coated Zn                                    | 2 M ZnSO <sub>4</sub>                              | 1 mA cm <sup>-2</sup><br>0.25 mAh cm <sup>-2</sup>                                                         | 45 mV                                 | 1000 h                    | Adv. Energy Mater. 2021, 11, 2100186.  |
| Nafion-Zn-X-coated Zn                                        | 2 M ZnSO <sub>4</sub>                              | 1 mA cm <sup>-2</sup><br>0.5 mAh cm <sup>-2</sup>                                                          | ~30 mV                                | 1000 h                    | Angew. Chem. Int. Ed. 2020, 59, 16594. |
| NaTi <sub>2</sub> (PO <sub>4</sub> ) <sub>3</sub> -coated Zn | 2 M ZnSO <sub>4</sub>                              | 1 mA cm <sup>-2</sup><br>1 mAh cm <sup>-2</sup>                                                            | ~45 mV                                | 260 h                     | Adv. Funct. Mater. 2020, 30, 2004885.  |
| F-TiO <sub>2</sub> -coated Zn                                | 0.5 M Zn(CH <sub>3</sub> COO) <sub>2</sub>         | 1 mA cm <sup>-2</sup><br>1 mAh cm <sup>-2</sup>                                                            | 20 mV                                 | 460 h                     | Nat. Commun. 2020, 11, 3961.           |
| Zn In                                                        | 2 M ZnSO <sub>4</sub>                              | 1 mA cm <sup>-2</sup><br>1 mAh cm <sup>-2</sup>                                                            | 120 mV                                | 500 h                     | Small 2020, 16, 2001736.               |
| C-coated Zn                                                  | 2 M ZnSO <sub>4</sub>                              | 1 mA cm <sup>-2</sup><br>1 mAh cm <sup>-2</sup>                                                            | 100 mV                                | 400 h                     | Adv. Energy Mater. 2020, 10, 1904215.  |
| ZnF <sub>2</sub> -coated Zn                                  | 2 M ZnSO <sub>4</sub>                              | 1 mA cm <sup>-2</sup><br>1 mAh cm <sup>-2</sup>                                                            | ~30 mV                                | 800 h                     | Adv. Mater. 2021, 33, 2007406.         |
| COF-coated Zn                                                | 2 M ZnSO <sub>4</sub>                              | 1 mA cm <sup>-2</sup><br>1 mAh cm <sup>-2</sup>                                                            | 36 mV                                 | 420 h                     | Adv. Mater. 2021, 33, 2101726.         |

### 3. Reference

- [1] H. Pan, Y. Shao, P. Yan, Y. Cheng, K. S. Han, Z. Nie, C. Wang, J. Yang, X. Li, P. Bhattacharya, K. T. Mueller, J. Liu, *Nat. Energy* **2016**, *1*, 16039.
- [2] G. Kresse, J. Furthmüller, *Comput. Mater. Sci.* **1996**, *6*, 15.
- [3] P. E. Blöchl, *Phys. Rev. B* **1994**, *50*, 17953.
- [4] G. Kresse, D. Joubert, *Phys. Rev. B* **1999**, *59*, 1758.
- [5] J. P. Perdew, K. Burke, M. Ernzerhof, *Phys. Rev. Lett.* **1996**, *77*, 3865.
- [6] B. Hammer, L. B. Hansen, J. K. Nørskov, *Phys. Rev. B* **1999**, *59*, 7413.
- [7] J. Dutkiewicz and W. Zakulski, *Bull. Alloy Phase Diagrams*, 1984, **5**, 284-289.
